# Supplementary material
Source: Springer Nature journal article supplement (https://www.springermedizin.de/resource/supplementary/13058_2013_3568_MOESM3_ESM.pdf/9703656)

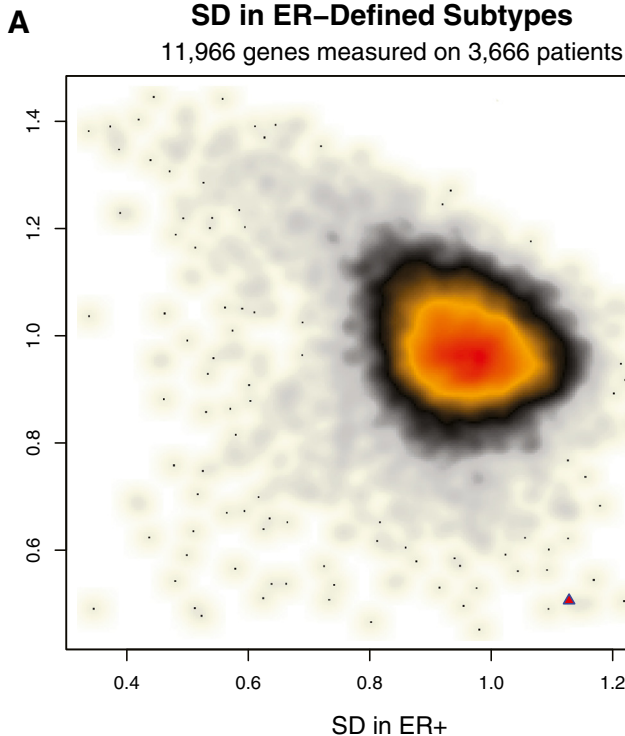

**B** **Progesterone Receptor by Estrogen Receptor Gene Expression**

n = 4,111

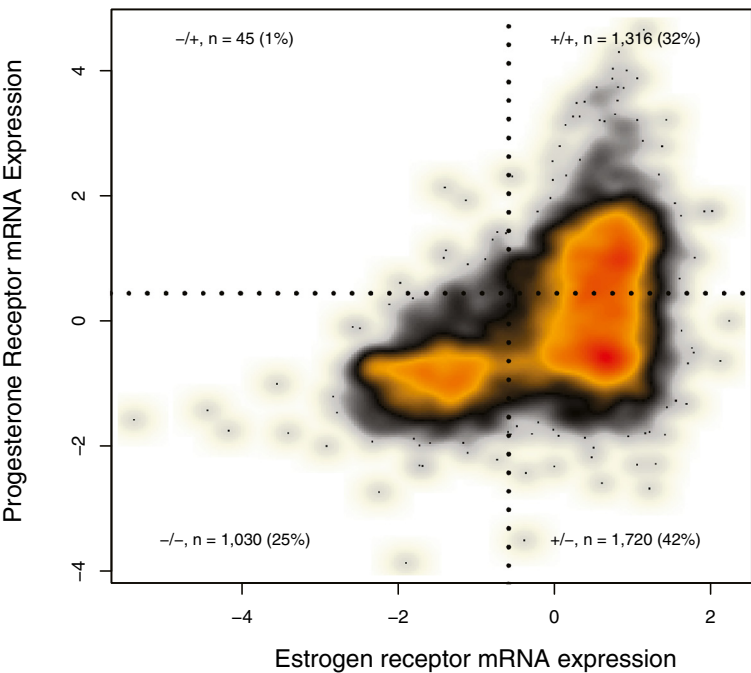

Supplement: MOESM3 [file 9703656]
